# Supplementary material for: Starting early: integration of self-management support into an acute stroke service
Source: HighWire-hosted journal article supplement (doi:10.1136/bmjquality.u202037.w1759), 2014-01-01
Supplement: ds4061.pdf [file ds4061.pdf]

**Figure 1: Overview of the Bridges Stroke self-management package**

**Training for practitioners including:**

- Theory, research and practical examples relating to stroke and self-management
- Debate and discussion about integration into practice, using case-based examples
- Practice using Bridges principles and patient workbook
- Completion of case reflections from using Bridges SMP in practice
- Developing individual and team action plans

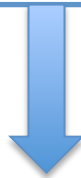

**Supporting self-management skills using:**

| <b>Daily interactions</b>                                                                                                                                      | <b>Patient-held workbook</b>                                                                                                                                              |
|----------------------------------------------------------------------------------------------------------------------------------------------------------------|---------------------------------------------------------------------------------------------------------------------------------------------------------------------------|
| <ul style="list-style-type: none"><li>• Encouraging problem-solving</li><li>• Enabling use of personal resources</li><li>• Changing focus of therapy</li></ul> | <ul style="list-style-type: none"><li>• Peer example 'vignettes'</li><li>• Reflecting on progress</li><li>• Recording aspirations/hopes</li><li>• Small targets</li></ul> |

(Jones and Bailey, 2013)
